# Supplementary material
Source: PubMed Central journal article supplement (PMC7370407)
Supplement: Supplementary_Data.pdf [file Supplementary_Data.pdf]

Table SI. Composition of Elental® (one package=80 g).

| Composition                           | Amount |
|---------------------------------------|--------|
| Energy (kcal)                         | 300    |
| Carbohydrate (g)                      |        |
| Dextrin                               | 63.41  |
| Fat (g)                               |        |
| Soy bean oil                          | 0.51   |
| Amino acid, total (g)                 | 14.1   |
| Amino acid (mg)                       |        |
| L-Isoleucine                          | 642    |
| L-Leucine                             | 899    |
| Lysine hydrochloride                  | 888    |
| L-Methionine                          | 648    |
| L-Phenylalanine                       | 871    |
| L-Threonine                           | 523    |
| L-Tryptophan                          | 151    |
| L-Valine                              | 701    |
| L-Histidine hydrochloride monohydrate | 501    |
| L-Arginine hydrochloride              | 1,125  |
| L-Alanine                             | 899    |
| L-Aspartic acid magnesium potassium   | 1,036  |
| L-Aspartic acid sodium monohydrate    | 867    |
| L-Glutamine                           | 1,932  |
| Aminoacetic acid                      | 505    |
| L-Proline                             | 630    |
| L-Serine                              | 1,159  |
| L-Tyrosine                            | 110    |
| Branched-chain amino acids (mg)       | 2,242  |
